# Supplementary material for: Efficient conversion of glucose to 5-hydroxymethylfurfural using bifunctional partially hydroxylated AlF3
Source: Royal Society of Chemistry journal article supplement (doi:10.1039/c5ra24013a), 2016-01-01
Supplement: c5ra24013a1.pdf [file c5ra24013a1.pdf]

## Supplementary Materials

### **Efficient conversion of glucose to 5-hydroxymethylfurfural by using bifunctional partially hydroxylated AlF<sub>3</sub>**

Ye-Min Lu, Hu Li, Jian He, Yan-Xiu Liu, Zhi-Bing Wu, De-Yu Hu and Song Yang\*

*State-Local Joint Laboratory for Comprehensive Utilization of Biomass, State Key Laboratory Breeding Base of Green Pesticide and Agricultural Bioengineering (Ministry of Education), Center for Research and Development of Fine Chemicals, Guizhou University, Guiyang 550025, China*

**Table S1** Acid distribution of AlF<sub>3</sub>-150, AlF<sub>3</sub>-250, and AlF<sub>3</sub>-350

| Catalyst              | Acid distribution (mmol/g) <sup>a</sup> |            |
|-----------------------|-----------------------------------------|------------|
|                       | Brønsted acid                           | Lewis acid |
| AlF <sub>3</sub> -150 | 0.0305                                  | 0.0669     |
| AlF <sub>3</sub> -250 | 0.0142                                  | 0.0434     |
| AlF <sub>3</sub> -350 | 0.0081                                  | 0.0276     |

<sup>a</sup> Deduced from the intensity of the band of Brønsted acid sites located at 1540 cm<sup>-1</sup> and Lewis acid sites at 1450 cm<sup>-1</sup> by using FT-IR of adsorbed pyridine.

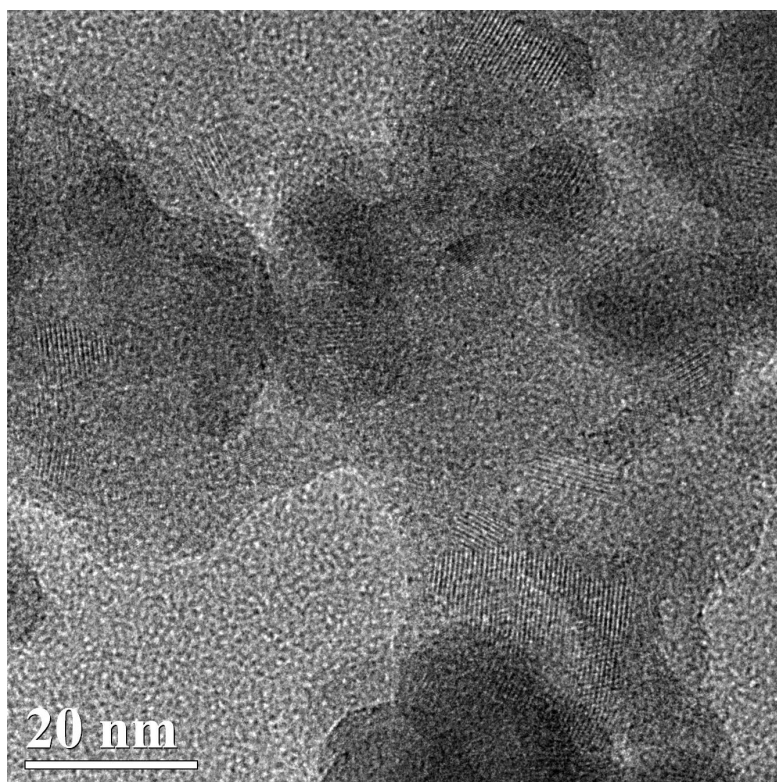

**Fig. S1.** TEM image of AlF<sub>3</sub>-150 sample

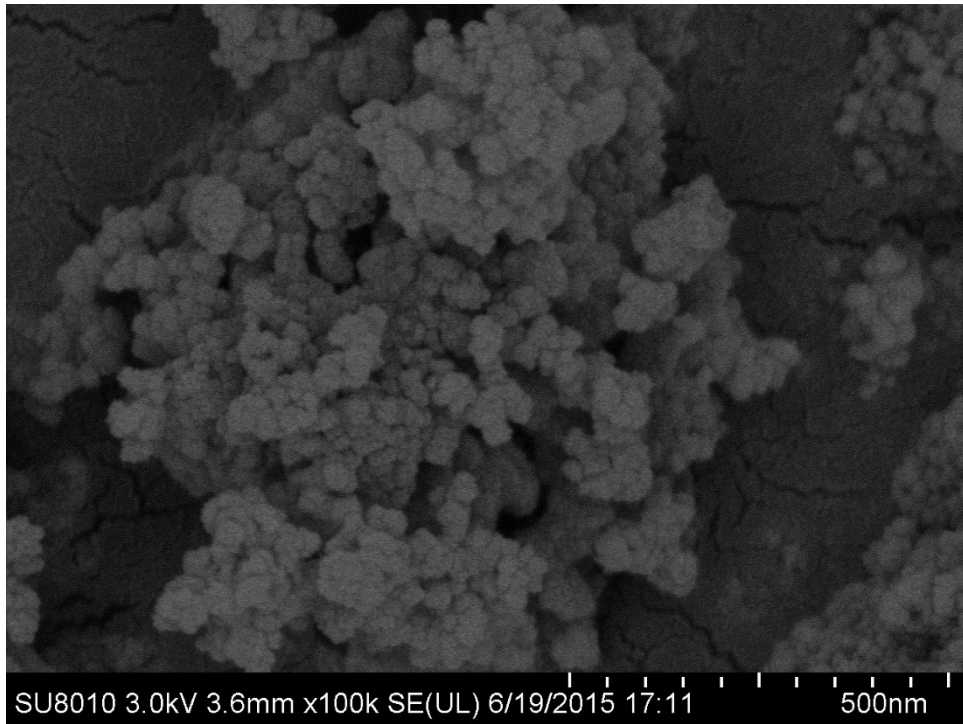

**Fig. S2.** SEM image of AlF<sub>3</sub>-150 sample

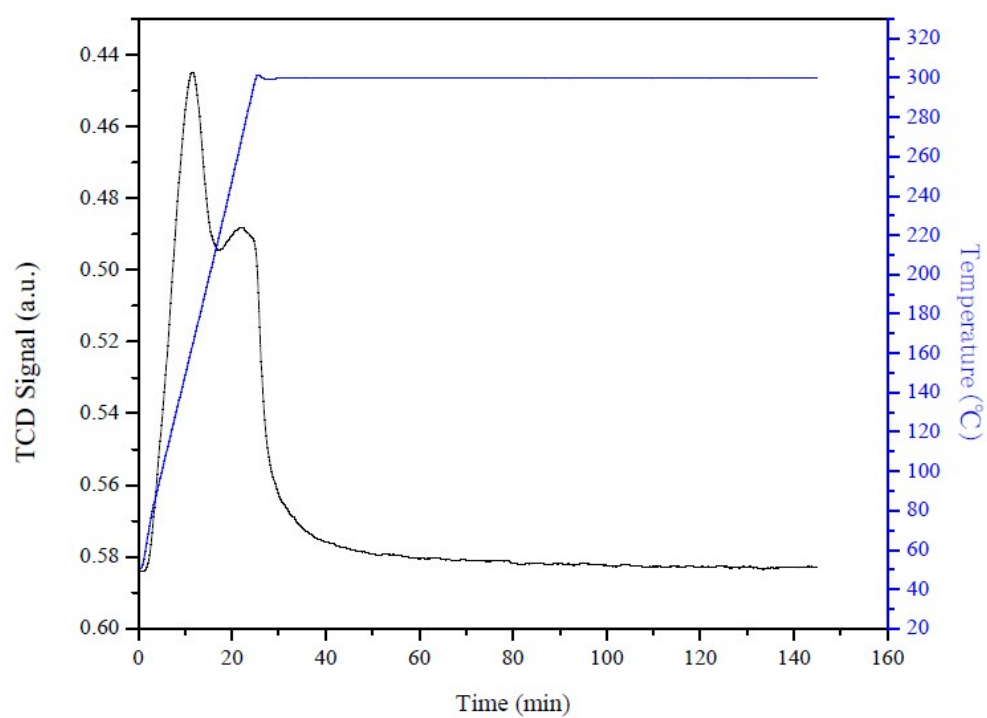

**Fig. S3.** NH<sub>3</sub>-TPD profile of AlF<sub>3</sub>-150 sample

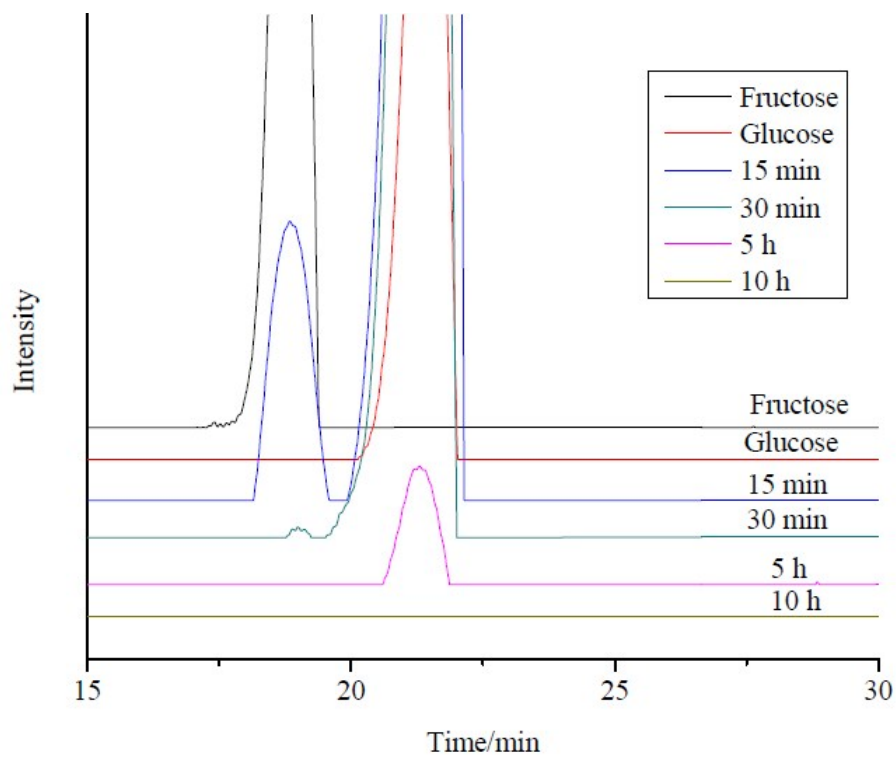

**Fig. S4.** HPLC images of the reaction mixture after reacting for 15 min, 30 min, 5 h and 10 h (Reaction conditions: 50 mg glucose, 1.0 g DMSO, 20 mg  $\text{AlF}_3$ -150, and 140 °C).

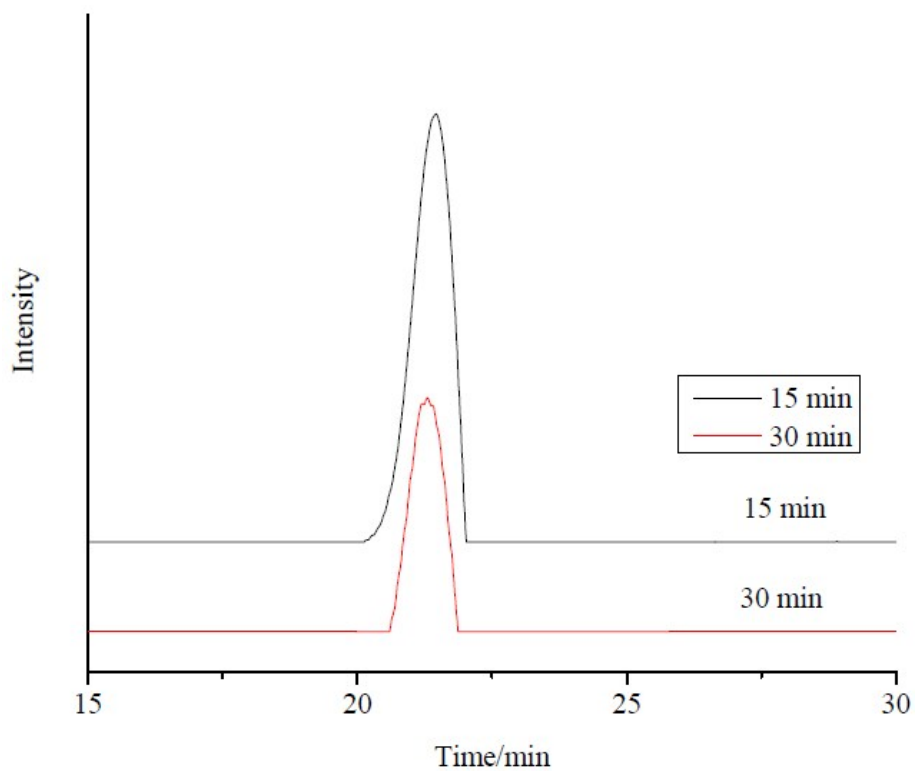

**Fig. S5.** HPLC images of the reaction mixture catalyzed by HCl for 15 and 30 min (Reaction conditions: 50 mg glucose, 1.0 g DMSO, 20 mg 0.01wt% HCl, and 140 °C).

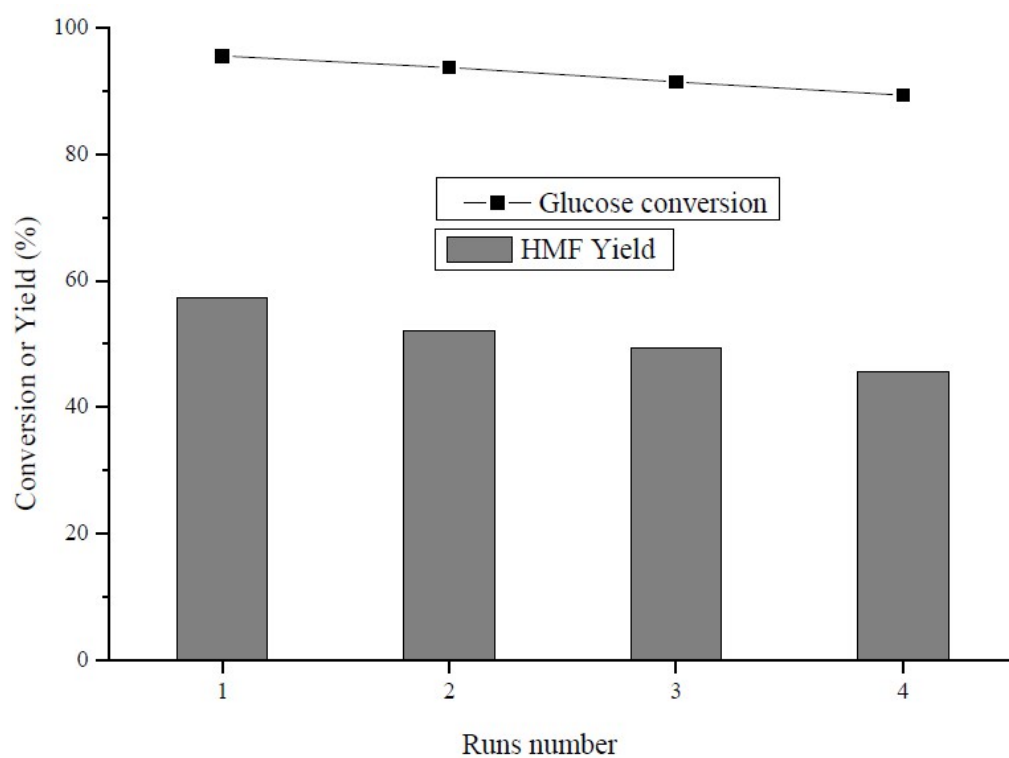

**Fig. S6.** Recyclability of AlF<sub>3</sub>-150 in glucose-to-HMF conversion (Reaction conditions: 50 mg glucose, 1.0 g DMSO, 20 mg catalyst, 140 °C, and 10 h).



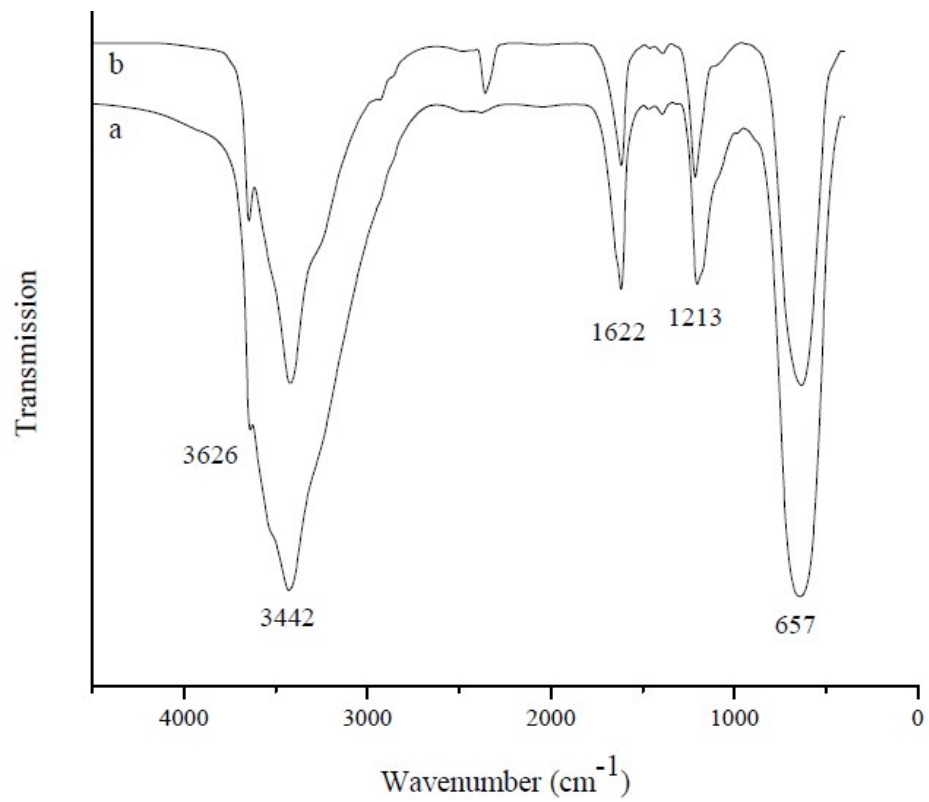

**Fig. S7.** FT-IR spectra of (a) fresh and (b) reused AlF<sub>3</sub>-150 samples

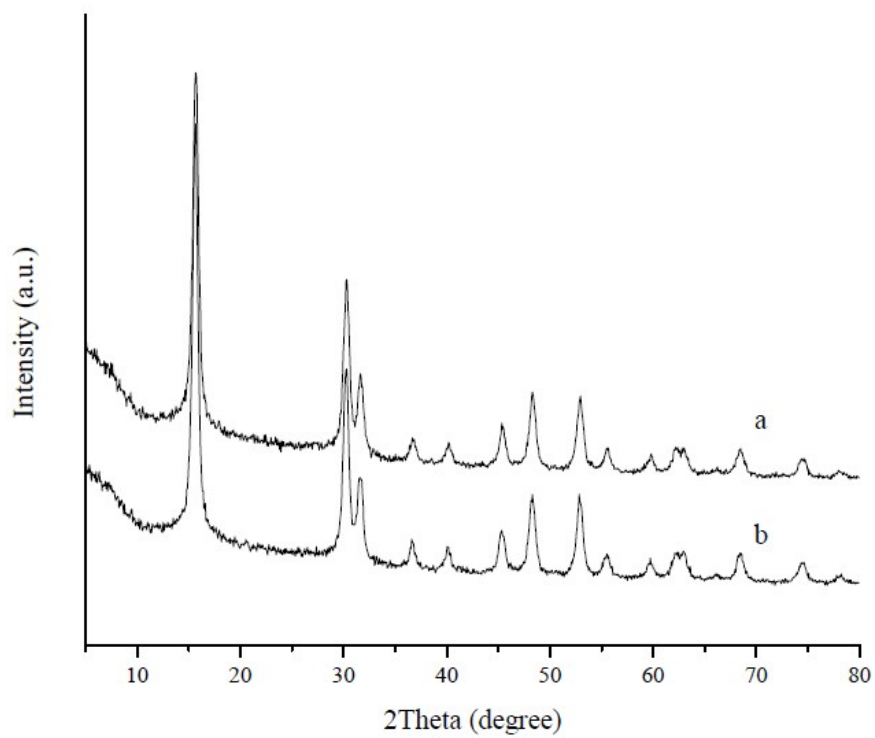

**Fig. S8.** XRD patterns of (a) fresh and (b) reused AlF<sub>3</sub>-150 samples
